# Supplementary material for: Clinical Outcomes of Specific Immunotherapy in Advanced Pancreatic Cancer: A Systematic Review and Meta-Analysis
Source: Hindawi journal article supplement (doi:10.1155/2017/8282391), 2017-01-01
Supplement: f1 [file 8282391.f1.pdf]

## Supplementary Tables

| Supplementary Table 1. Quality of studies with self-control data |         |     |     |     |     |     |     |         |
|------------------------------------------------------------------|---------|-----|-----|-----|-----|-----|-----|---------|
| Author (Year)                                                    | Q1      | Q2  | Q3  | Q4  | Q5  | Q6  | Q7  | Quality |
| Brett (2002)                                                     | Yes     | No  | Yes | Yes | Yes | Yes | Yes | High    |
| Cai (2013)                                                       | Yes     | Yes | Yes | Yes | Yes | Yes | Yes | High    |
| Kameshima (2013)                                                 | Yes     | Yes | Yes | Yes | No  | Yes | No  | Low     |
| Koido (2014)                                                     | Yes     | Yes | Yes | Yes | Yes | Yes | Yes | High    |
| Kondo (2008)                                                     | Unclear | Yes | Yes | Yes | Yes | Yes | No  | Low     |
| Kubuschok (2012)                                                 | No      | Yes | Yes | Yes | Yes | Yes | Yes | High    |
| Nishida (2014)                                                   | Yes     | Yes | Yes | Yes | No  | Yes | Yes | High    |
| Qiu (2013)                                                       | Unclear | Yes | Yes | Yes | Yes | Yes | Yes | High    |
| Sultana (2009)                                                   | Unclear | Yes | Yes | No  | Yes | No  | Yes | Low     |
| Suzuki (2014)                                                    | Yes     | No  | Yes | Yes | Yes | Yes | Yes | High    |
| Yanagimoto (2010)                                                | Yes     | Yes | No  | Yes | Yes | Yes | Yes | High    |
| Yutani (2013)                                                    | Yes     | Yes | No  | Yes | Yes | Yes | Yes | High    |

| Supplementary Table 2. Quality of studies with case-control data |         |     |     |     |     |     |     |         |
|------------------------------------------------------------------|---------|-----|-----|-----|-----|-----|-----|---------|
| Author (Year)                                                    | Q1      | Q2  | Q3  | Q4  | Q5  | Q6  | Q7  | Quality |
| Asahara (2013)                                                   | No      | No  | No  | Yes | Yes | Yes | No  | Low     |
| Bernhardt (2006)                                                 | Yes     | Yes | No  | Yes | Yes | Yes | No  | Low     |
| Chawla (2010)                                                    | Yes     | No  | No  | Yes | Yes | Yes | Yes | Low     |
| Endo (2012)                                                      | Yes     | Yes | No  | Yes | Yes | Yes | Yes | High    |
| Gjertsen (2001)                                                  | Yes     | Yes | No  | Yes | Yes | Yes | Yes | High    |
| Le (2013)                                                        | Yes     | Yes | Yes | Yes | Yes | Yes | Yes | High    |
| Le (2015)                                                        | Yes     | Yes | Yes | Yes | Yes | Yes | Yes | High    |
| Liu (2012)                                                       | Unclear | Yes | No  | Yes | Yes | Yes | No  | Low     |
| Liu (2010)                                                       | Unclear | Yes | No  | Yes | Yes | Yes | Yes | Low     |
| Middleton (2014)                                                 | Yes     | Yes | Yes | Yes | Yes | Yes | Yes | High    |
| Piozzi (2015)                                                    | Yes     | No  | No  | Yes | Yes | Yes | Yes | Low     |
| Wen (2013)                                                       | Yes     | Yes | Yes | Yes | Yes | Yes | No  | High    |
| Zhang (2012)                                                     | Unclear | No  | No  | Yes | Yes | Yes | Yes | Low     |

**Supplementary Table 3. Subgroup results of meta-analyses about 3-month to 12-month OS**

| Study Group        | Description      | No. of studies | OR ( 95% CI )       | Significance P Value | I <sup>2</sup> (%) | Heterogeneity P Value |
|--------------------|------------------|----------------|---------------------|----------------------|--------------------|-----------------------|
| <b>3-month OS</b>  |                  |                |                     |                      |                    |                       |
| Therapy Type       | ASI              | 4              | 6.39 ( 1.07-38.16)  | 0.04                 | 73                 | 0.006                 |
|                    | PSI              | 2              | 1.96 ( 0.74-5.19)   | 0.17                 | 0                  | 0.63                  |
| Tumor Stage        | IV Grade Alone   | 1              | 3.43 ( 0.29-40.95)  | 0.33                 | 0                  | >0.99                 |
|                    | Mixed or Unknown | 5              | 4.54 ( 1.27-16.31)  | 0.02                 | 68                 | 0.008                 |
| Study Quality      | High             | 3              | 3.79 ( 0.65-22.19)  | 0.14                 | 64                 | 0.04                  |
|                    | Low              | 3              | 5.66 ( 0.75-42.79)  | 0.09                 | 72                 | 0.03                  |
| Study Location     | America          | 2              | 1.55 ( 0.76-3.18 )  | 0.23                 | 0                  | 0.73                  |
|                    | Asia             | 1              | 0.57 ( 0.03-10.43)  | 0.71                 | 0                  | >0.99                 |
|                    | Europe           | 3              | 16.94 ( 3.97-72.24) | 0.0001               | 17                 | 0.3                   |
| <b>6-month OS</b>  |                  |                |                     |                      |                    |                       |
| Therapy Type       | ASI              | 7              | 3.70 ( 1.22-11.24)  | 0.02                 | 72                 | 0.001                 |
|                    | PSI              | 5              | 3.31 ( 1.63-6.74 )  | 0.001                | 0                  | 0.9                   |
| Tumor Stage        | III & IV Grade   | 2              | 2.76 ( 0.72-10.58)  | 0.14                 | 0                  | 0.54                  |
|                    | IV Grade Alone   | 2              | 3.28 ( 0.57-18.97)  | 0.18                 | 13                 | 0.28                  |
|                    | Mixed or Unknown | 8              | 3.44 ( 1.39-8.49 )  | 0.007                | 73                 | 0.0005                |
| Study Quality      | High             | 9              | 3.38 ( 1.41-8.11 )  | 0.006                | 68                 | 0.002                 |
|                    | Low              | 3              | 3.45 ( 1.32-9.05 )  | 0.01                 | 0                  | 0.7                   |
| Study Location     | America          | 5              | 3.27 ( 1.72-6.21 )  | 0.003                | 0                  | 0.9                   |
|                    | Asia             | 3              | 4.63 ( 0.80-26.74)  | 0.09                 | 30                 | 0.24                  |
|                    | Europe           | 4              | 3.64 ( 0.79-16.78)  | 0.1                  | 76                 | 0.006                 |
| <b>12-month OS</b> |                  |                |                     |                      |                    |                       |
| Therapy Type       | ASI              | 10             | 3.05 ( 1.49-6.24 )  | 0.002                | 53                 | 0.02                  |
|                    | PSI              | 4              | 5.42 ( 1.39-21.18 ) | 0.02                 | 0                  | 0.92                  |
| Tumor Stage        | III & IV Grade   | 2              | 4.62 ( 0.84-25.43)  | 0.08                 | 0                  | 0.55                  |
|                    | IV Grade Alone   | 2              | 11.51 ( 1.61-82.82) | 0.02                 | 0                  | 0.68                  |
|                    | Mixed or Unknown | 10             | 1.59 ( 1.18-2.13 )  | 0.002                | 46                 | 0.05                  |
| Study Quality      | High             | 9              | 1.53 ( 1.13-2.06 )  | 0.005                | 52                 | 0.03                  |
|                    | Low              | 5              | 5.23 ( 1.96-13.93)  | 0.0009               | 0                  | 0.98                  |
| Study Location     | America          | 4              | 5.00 ( 1.64-15.24)  | 0.005                | 0                  | 0.95                  |
|                    | Asia             | 5              | 3.50 ( 1.51-8.10 )  | 0.003                | 26                 | 0.25                  |
|                    | Europe           | 5              | 2.15 ( 0.77-5.96 )  | 0.14                 | 26                 | 0.25                  |

**Supplementary Table 4. Subgroup results of meta-analyses about 1.5-year to 3-year OS**

| Study Group        | Description      | No. of studies | OR ( 95% CI )         | Significance P Value | I <sup>2</sup> (%) | Heterogeneity P Value |
|--------------------|------------------|----------------|-----------------------|----------------------|--------------------|-----------------------|
| <b>1.5-year OS</b> |                  |                |                       |                      |                    |                       |
| Therapy Type       | AS1              | 7              | 1.23 ( 0.77-1.97 )    | 0.39                 | 0                  | 0.48                  |
|                    | PS1              | 2              | 2.73 ( 0.45-16.67 )   | 0.28                 | 0                  | 0.56                  |
| Tumor Stage        | III & IV Grade   | 2              | 2.73 ( 0.45-16.67 )   | 0.28                 | 0                  | 0.56                  |
|                    | IV Grade Alone   | 1              | 7.93 ( 0.35-179.96 )  | 0.19                 | 0                  | >0.99                 |
|                    | Mixed or Unknown | 6              | 1.18 ( 0.73-1.90 )    | 0.5                  | 0                  | 0.54                  |
| Study Quality      | High             | 8              | 1.28 ( 0.80-2.02 )    | 0.3                  | 0                  | 0.49                  |
|                    | Low              | 1              | 2.65 ( 0.1-68.3 )     | 0.56                 | 0                  | >0.99                 |
| Study Location     | America          | 2              | 2.97 ( 0.31-28.01 )   | 0.34                 | 0                  | 0.55                  |
|                    | Asia             | 3              | 2.97 ( 0.59-14.88 )   | 0.18                 | 24                 | 0.27                  |
|                    | Europe           | 4              | 1.13 ( 0.69-1.86 )    | 0.62                 | 0                  | 0.6                   |
| <b>2-year OS</b>   |                  |                |                       |                      |                    |                       |
| Therapy Type       | AS1              | 3              | 1.57 ( 0.41-6.01 )    | 0.51                 | 0                  | 0.51                  |
|                    | PS1              | 3              | 8.84 ( 1.46-53.52 )   | 0.02                 | 0                  | 0.84                  |
| Tumor Stage        | III & IV Grade   | 2              | 10.4 ( 1.12-96.68 )   | 0.04                 | 0                  | 0.59                  |
|                    | IV Grade Alone   | 2              | 1.13 ( 0.28-5.01 )    | 0.87                 | 0                  | 0.57                  |
|                    | Mixed or Unknown | 2              | 6.56 ( 0.74-57.97 )   | 0.09                 | 0                  | 0.99                  |
| Study Quality      | High             | 6              | 2.91 ( 0.99-8.53 )    | 0.05                 | 0                  | 0.55                  |
| Study Location     | America          | 1              | 5.74 ( 0.25-130.37 )  | 0.27                 | 0                  | >0.99                 |
|                    | Asia             | 3              | 1.58 ( 0.42-6.03 )    | 0.5                  | 0                  | 0.5                   |
|                    | Europe           | 2              | 11.14 ( 1.21-103.04 ) | 0.03                 | 0                  | 0.64                  |
| <b>3-year OS</b>   |                  |                |                       |                      |                    |                       |
| Therapy Type       | AS1              | 3              | 2.74 ( 1.10-6.86 )    | 0.03                 | 0                  | 0.92                  |
|                    | PS1              | 1              | 3.46 ( 0.12-100.51 )  | 0.47                 | 0                  | >0.99                 |
| Tumor Stage        | III & IV Grade   | 1              | 3.46 ( 0.12-100.51 )  | 0.47                 | 0                  | >0.99                 |
|                    | Mixed or Unknown | 3              | 2.74 ( 1.10-6.86 )    | 0.03                 | 0                  | 0.92                  |
| Study Quality      | High             | 3              | 2.28 ( 0.46-11.20 )   | 0.31                 | 0                  | 0.95                  |
|                    | Low              | 1              | 3.05 ( 1.05-8.84 )    | 0.04                 | 0                  | >0.99                 |
| Study Location     | Asia             | 3              | 2.74 ( 1.10-6.86 )    | 0.03                 | 0                  | 0.92                  |
|                    | Europe           | 1              | 3.46 ( 0.12-100.51 )  | 0.47                 | 0                  | >0.99                 |

**Supplementary Table 5. Subgroup results of meta-analyses about immune responses before and after specific immunotherapy**

| Study Group              | Description      | No. of studies | OR ( 95% CI )      | Significance P Value | <i>I</i> <sup>2</sup> (%) | Heterogeneity P Value |
|--------------------------|------------------|----------------|--------------------|----------------------|---------------------------|-----------------------|
| <b>CTL-response</b>      |                  |                |                    |                      |                           |                       |
| Therapy Type             | ASI              | 3              | 3.63 ( 1.72-7.65 ) | 0.0007               | 0                         | 0.97                  |
| Tumor Stage              | III & IV Grade   | 1              | 4.0 ( 0.56-28.40 ) | 0.17                 | 0                         | >0.99                 |
|                          | IV Grade Alone   | 1              | 4.0 ( 1.11-14.43 ) | 0.03                 | 0                         | >0.99                 |
|                          | Mixed or Unknown | 1              | 3.31 ( 1.17-9.36 ) | 0.02                 | 0                         | >0.99                 |
| Study Quality            | High             | 2              | 4.0 ( 1.37-11.70 ) | 0.01                 | 0                         | 1                     |
|                          | Low              | 1              | 3.31 ( 1.17-9.36 ) | 0.02                 | 0                         | >0.99                 |
| Study Location           | Asia             | 3              | 3.63 ( 1.72-7.65 ) | 0.0007               | 0                         | 0.97                  |
| <b>Antibody-response</b> |                  |                |                    |                      |                           |                       |
| Therapy Type             | ASI              | 2              | 2.94 ( 1.37-6.29 ) | 0.006                | 0                         | 0.83                  |
|                          | PSI              | 1              | 3.45 ( 1.19-9.99 ) | 0.02                 | 0                         | >0.99                 |
| Tumor Stage              | III & IV Grade   | 1              | 3.45 ( 1.19-9.99 ) | 0.02                 | 0                         | >0.99                 |
|                          | IV Grade Alone   | 2              | 2.94 ( 1.37-6.29 ) | 0.006                | 0                         | 0.83                  |
| Study Quality            | High             | 3              | 3.10 ( 1.67-5.76 ) | 0.0003               | 0                         | 0.95                  |
| Study Location           | Asia             | 2              | 2.94 ( 1.37-6.29 ) | 0.006                | 0                         | 0.83                  |
|                          | Europe           | 1              | 3.45 ( 1.19-9.99 ) | 0.02                 | 0                         | >0.99                 |

**Supplementary Table 6. Subgroup results of meta-analyses about lymphocyte subset percentages**

| Study Group      | Description      | No. of studies | OR ( 95% CI )            | Significance P Value | I <sup>2</sup> (%) | Heterogeneity P Value |
|------------------|------------------|----------------|--------------------------|----------------------|--------------------|-----------------------|
| <b>CD4+</b>      |                  |                |                          |                      |                    |                       |
| Therapy Type     | ASI              | 4              | 7.89 ( 0.30-15.48 )      | 0.04                 | 97                 | <0.00001              |
| Tumor Stage      | III & IV Grade   | 2              | 7.58 ( -10.64-25.81 )    | 0.41                 | 98                 | <0.00001              |
|                  | Mixed or Unknown | 2              | 7.81 ( 1.31-14.32 )      | 0.02                 | 92                 | 0.0006                |
| Study Quality    | High             | 1              | -1.90 ( -7.23-3.43 )     | 0.48                 | 0                  | >0.99                 |
|                  | Low              | 3              | 10.85 ( 3.02-18.69 )     | 0.007                | 97                 | <0.00001              |
| Study Location   | Asia             | 4              | 7.89 ( 0.30-15.48 )      | 0.04                 | 97                 | <0.00001              |
| <b>CD8+</b>      |                  |                |                          |                      |                    |                       |
| Therapy Type     | ASI              | 4              | 7.89 ( 0.30-15.48 )      | 0.04                 | 97                 | <0.00001              |
| Tumor Stage      | III & IV Grade   | 2              | 7.58 ( -10.64-25.81 )    | 0.41                 | 98                 | <0.00001              |
|                  | Mixed or Unknown | 2              | 7.81 ( 1.31-14.32 )      | 0.02                 | 92                 | 0.0006                |
| Study Quality    | High             | 1              | -1.90 ( -7.23-3.43 )     | 0.48                 | 0                  | >0.99                 |
|                  | Low              | 3              | 10.85 ( 3.02-18.69 )     | 0.007                | 97                 | <0.00001              |
| Study Location   | Asia             | 4              | 7.89 ( 0.30-15.48 )      | 0.04                 | 97                 | <0.00001              |
| <b>CD56+</b>     |                  |                |                          |                      |                    |                       |
| Therapy Type     | ASI              | 6              | 3.74 ( -2.46-9.94 )      | 0.24                 | 99                 | <0.00001              |
| Tumor Stage      | III & IV Grade   | 4              | 3.15 ( -5.71-12.00 )     | 0.49                 | 99                 | <0.00001              |
|                  | Mixed or Unknown | 2              | 5.05 ( 0.74-9.36 )       | 0.02                 | 0                  | >0.99                 |
| Study Quality    | High             | 2              | 6.68 ( -3.99-17.35 )     | 0.22                 | 91                 | 0.0009                |
|                  | Low              | 4              | 2.37 ( -5.39-10.12 )     | 0.55                 | 99                 | <0.00001              |
| Study Location   | Asia             | 6              | 3.74 ( -2.46-9.94 )      | 0.24                 | 99                 | <0.00001              |
| <b>CD4+/CD8+</b> |                  |                |                          |                      |                    |                       |
| Therapy Type     | ASI              | 4              | 0.38 ( 0.31-0.44 )       | <0.0001              | 0                  | 0.61                  |
| Tumor Stage      | III & IV Grade   | 2              | 0.51 ( 0.27-0.76 )       | <0.0001              | 0                  | 0.56                  |
|                  | Mixed or Unknown | 2              | 0.36 ( 0.29-0.43 )       | <0.0001              | 0                  | 0.68                  |
| Study Quality    | High             | 1              | 0.40 ( -0.06-0.86 )      | 0.09                 | 0                  | >0.99                 |
|                  | Low              | 3              | 0.37 ( 0.31-0.44 )       | <0.0001              | 0                  | 0.4                   |
| Study Location   | Asia             | 4              | 0.38 ( 0.31-0.44 )       | <0.0001              | 0                  | 0.61                  |
| <b>CD4+CD25+</b> |                  |                |                          |                      |                    |                       |
| Therapy Type     | ASI              | 3              | -2.66 ( -4.35 to -0.96 ) | 0.002                | 79                 | 0.009                 |
| Tumor Stage      | III & IV Grade   | 1              | -1.20 ( -2.22 to -0.18 ) | 0.02                 | 0                  | >0.99                 |
|                  | Mixed or Unknown | 2              | -3.52 ( -4.16 to -2.44 ) | <0.00001             | 0                  | 0.85                  |
| Study Quality    | High             | 1              | -1.20 ( -2.22 to -0.18 ) | 0.02                 | 0                  | >0.99                 |
|                  | Low              | 2              | -3.52 ( -4.16 to -2.44 ) | <0.00001             | 0                  | 0.85                  |
| Study Location   | Asia             | 3              | 2.66 ( -4.35 to -0.96 )  | 0.002                | 79                 | 0.009                 |

**Supplementary Table 7. Subgroup results of meta-analyses about cytokine before and after specific immunotherapy**

| Study Group    | Description      | No. of studies | OR ( 95% CI )         | Significance P Value | I <sup>2</sup> (%) | Heterogeneity P Value |
|----------------|------------------|----------------|-----------------------|----------------------|--------------------|-----------------------|
| <b>IFN-γ</b>   |                  |                |                       |                      |                    |                       |
| Therapy Type   | ASI              | 4              | 3.75 ( 0.77-6.73 )    | 0.01                 | 77                 |                       |
| Tumor Stage    | III & IV Grade   | 1              | 19.13 ( 10.03-28.23 ) | <0.0001              | 0                  |                       |
|                | IV Grade Alone   | 1              | 2.22 ( -25.41-29.85 ) | 0.87                 | 0                  |                       |
|                | Mixed or Unknown | 2              | 2.28 ( 1.33-3.22 )    | <0.00001             | 0                  |                       |
| Study Quality  | High             | 1              | 2.22 ( -25.41-29.85 ) | 0.87                 | 0                  |                       |
|                | Low              | 3              | 3.87 ( 0.75-7.00 )    | 0.02                 | 85                 |                       |
| Study Location | Asia             | 4              | 3.75 ( 0.77-6.73 )    | 0.01                 | 77                 |                       |

**Supplementary Table 8. Subgroup results of meta-analyses about serum cancer marker before and after specific immunotherapy**

| Study Group    | Description      | No. of studies | OR ( 95% CI )                  | Significance P Value | I <sup>2</sup> (%) | Heterogeneity P Value |
|----------------|------------------|----------------|--------------------------------|----------------------|--------------------|-----------------------|
| <b>CA19-9</b>  |                  |                |                                |                      |                    |                       |
| Therapy Type   | ASI              | 4              | -238.52 ( -319.87 to -157.17 ) | <0.00001             | 61                 | 0.05                  |
| Tumor Stage    | III & IV Grade   | 2              | -175.95 ( -253.33 to -98.56 )  | <0.00001             | 0                  | 0.57                  |
|                | Mixed or Unknown | 2              | -338.93 ( -556.43 to -121.42 ) | 0.002                | 60                 | 0.12                  |
| Study Quality  | High             | 3              | -223.65 ( -296.91 to -150.40 ) | <0.00001             | 60                 | 0.08                  |
|                | Low              | 1              | -507.80 ( -807.51 to -208.09 ) | 0.0009               | 0                  | >0.99                 |
| Study Location | Asia             | 3              | -229.57 ( -363.35 to -95.80 )  | 0.0008               | 58                 | 0.09                  |
|                | Europe           | 1              | -266.00 ( -292.60 to -239.40 ) | <0.00001             | 0                  | >0.99                 |
